# Supplementary material for: A Drug-Sensitive Genetic Network Masks Fungi from the Immune System
Source: PLOS journal article supplement (doi:10.1371/journal.ppat.0020035), 2006-04-24

A

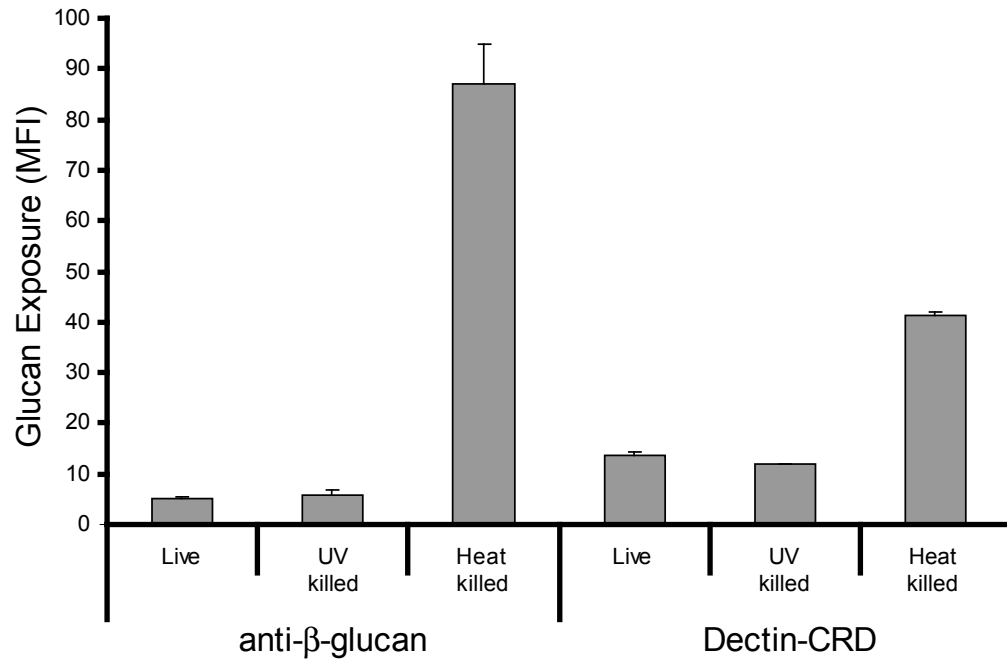

B

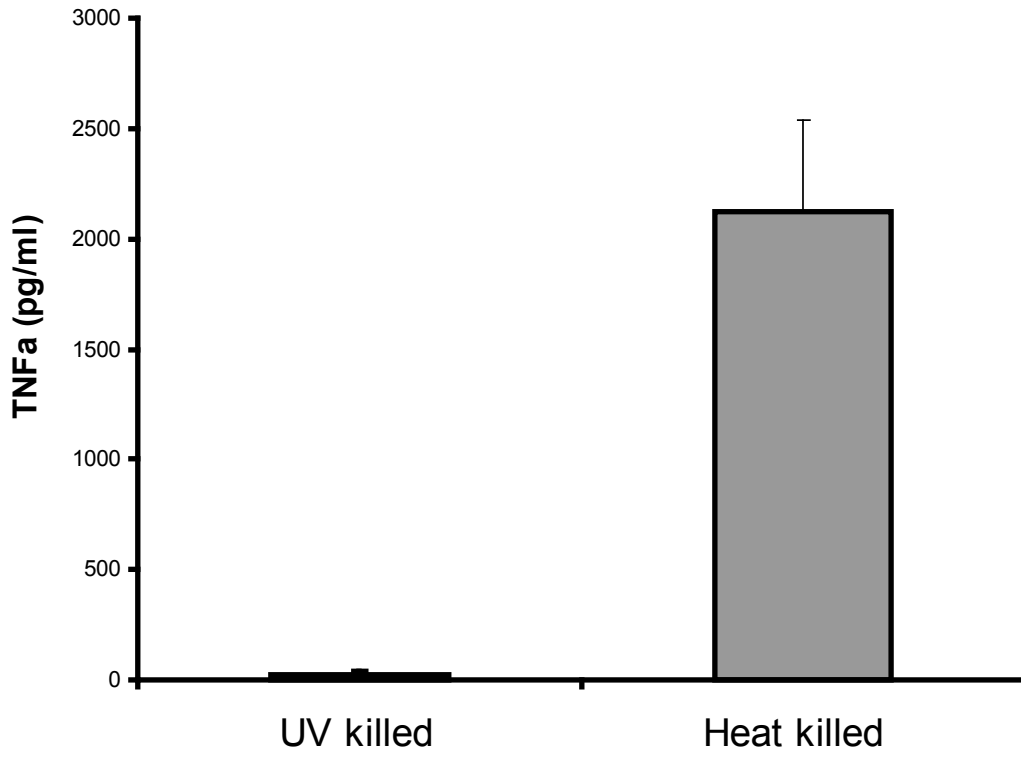

Supplement: S1 (10.1371/journal.ppat.0020035.s001) [file journal.ppat.0020035.s001]
